# Supplementary material for: microRNA-9 targets the long non-coding RNA MALAT1 for degradation in the nucleus
Source: PubMed Central journal article supplement — Sci Rep. 2013 Aug 29;3:2535. doi: 10.1038/srep02535 (PMC3756333; doi:10.1038/srep02535), 2013-08-29

**microRNA-9 targets the long non-coding RNA *MALAT1* for degradation in the nucleus**

*Eleonora Leucci<sup>1,#</sup>, Francesca Patella<sup>1,2</sup>, Johannes Waage<sup>1,3</sup>, Kim Holmstrøm<sup>5</sup>, Morten Lindow<sup>6</sup>, Bo Porse<sup>1,3,4</sup>, Sakari Kauppinen<sup>6,7</sup>, and Anders H. Lund<sup>1,\*</sup>*

<sup>1</sup> Biotech Research and Innovation Centre and Centre for Epigenetics, University of Copenhagen, Denmark.

<sup>2</sup> Scuola Superiore Sant'Anna, Pisa Italy.

<sup>3</sup> Finsen Laboratory Rigshospitalet, Faculty of Health Sciences, University of Copenhagen, Denmark.

<sup>4</sup> Danish Stem Cell Centre (DanStem) Faculty of Health Sciences, University of Copenhagen, Denmark.

<sup>5</sup> Bioneer A/S, Hørsholm, Denmark.

<sup>6</sup> Santaris Pharma, Hørsholm, Denmark.

<sup>7</sup> Department of Health Science and Technology, Aalborg University Copenhagen, Denmark.

**Running Title: miR-9 targets MALAT1 in the nucleus**

Correspondence should be addressed to:

\*Prof. Anders H. Lund

BRIC, Copenhagen BioCenter

University of Copenhagen

Ole Maaløes Vej 5

DK-2200 Copenhagen N

E-mail: [anders.lund@bric.ku.dk](mailto:anders.lund@bric.ku.dk)

Tel.: +45 35325657; Fax: +45 35325669

#*Eleonora Leucci's current address*: VIB Laboratory for Molecular Cancer Biology, KU Leuven, Campus Gasthuisberg, Herestraat 49, bus 602, 3000 LEUVEN. E-mail:

[Eleonora.leucci@cme.vib-kuleuven.be](mailto:Eleonora.leucci@cme.vib-kuleuven.be)

Supplementary figures:

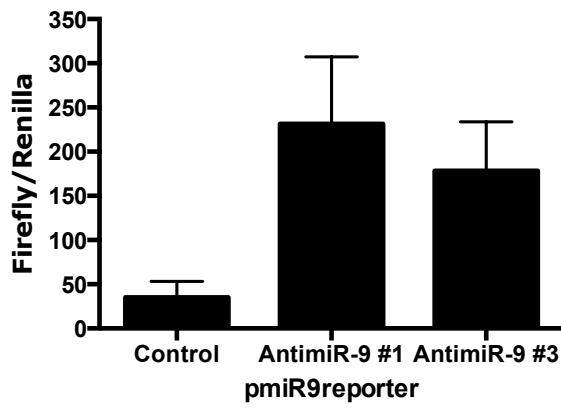

a

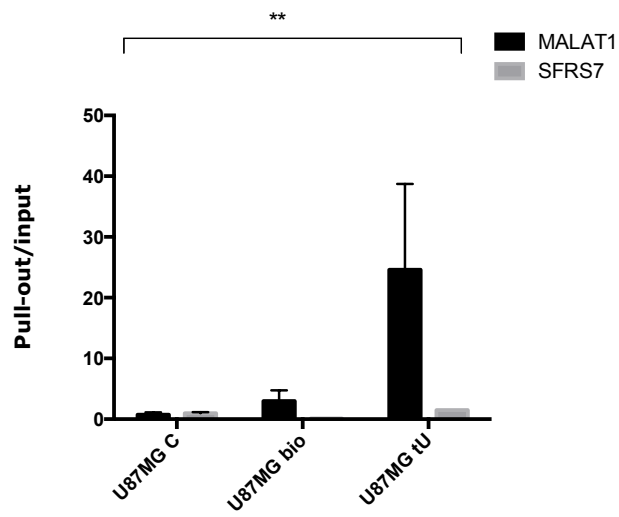

b

Supplementary Fig.1a-b:

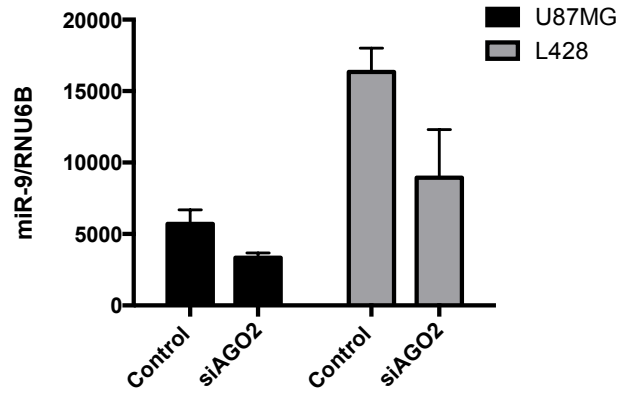

a

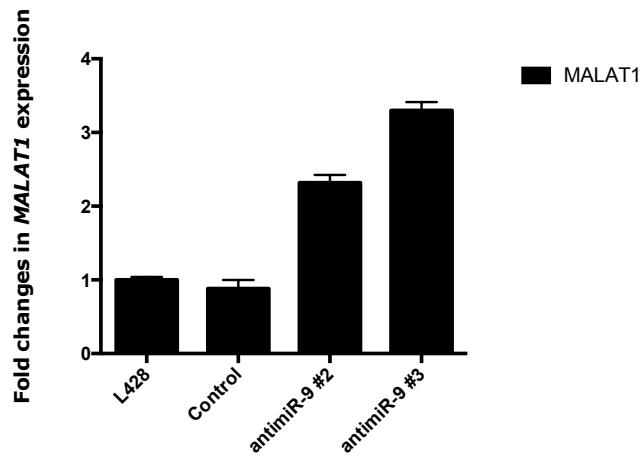

b

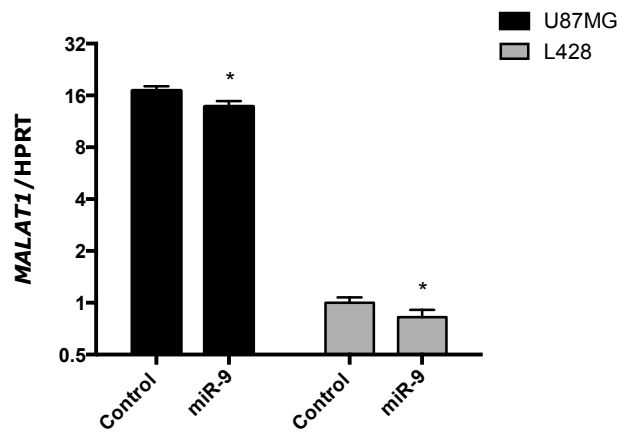

c

Supplementary Fig.2a-c:

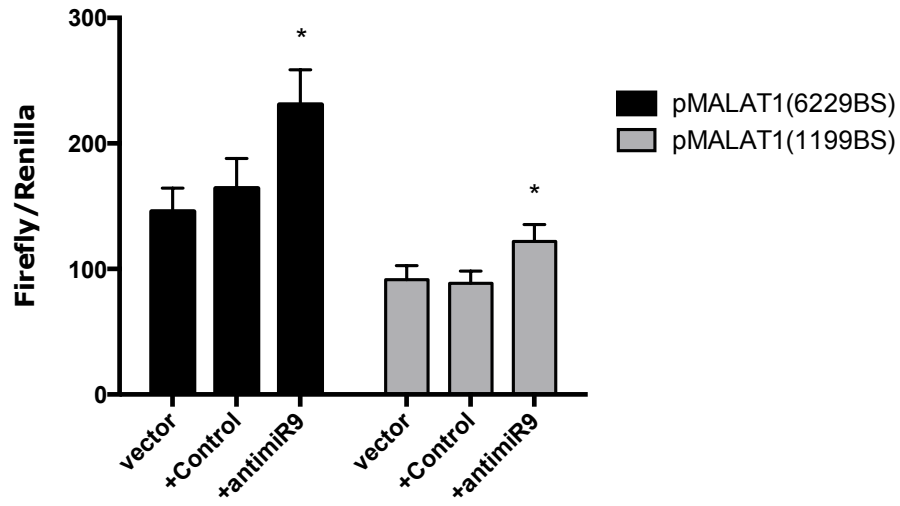

Supplementary Fig.3:

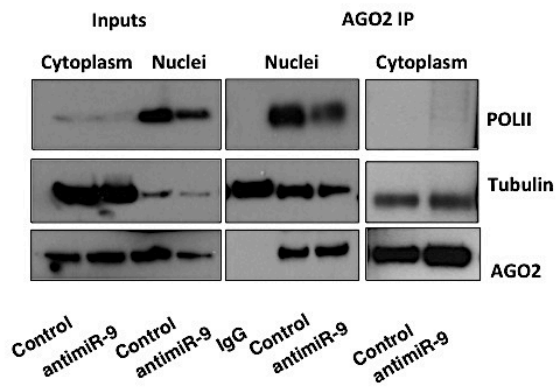

**a**

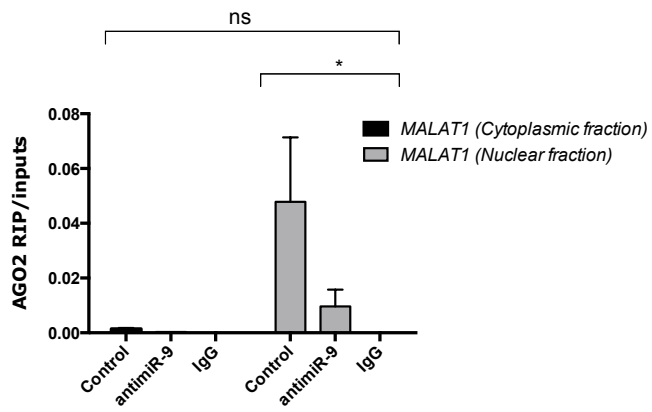

**b**

**Supplementary Fig. 4a-b**

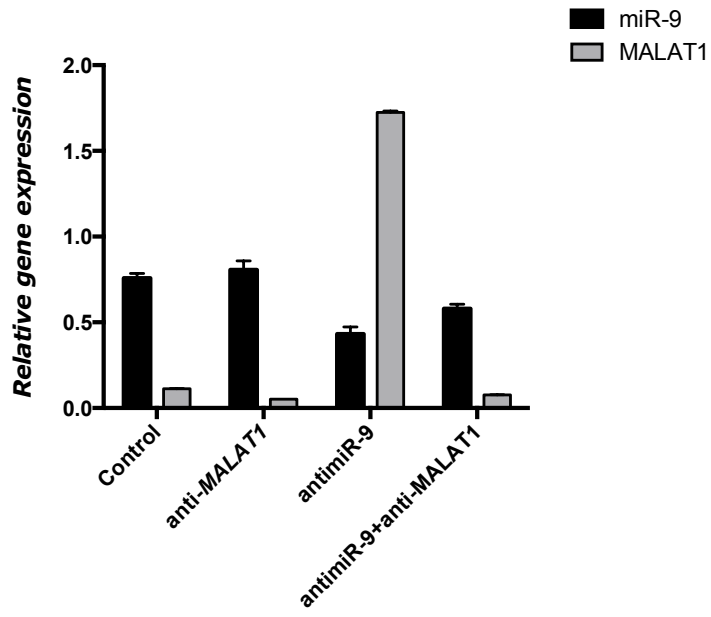

Supplementary figure 5

### **Supplementary figure legends:**

#### **Supplementary Table 1:**

Differentially expressed genes were identified by RNA-seq, sequencing was carried on in biological duplicates and hits filtered for  $FDR < 0.05$ , yielding 8,295,863 and 106,747,280 reads for the scramble transfected control, and 8,177,967 and 21,921,280 for the anti-miR-9 transfected cells. 72% and 51% reads mapped to the scrambled treated duplicates, and 73% and 60% mapped to the anti-miR-9 treated duplicates.

#### **Supplementary Fig.1a-b:**

**a)** The efficiency and specificity of miR-9 inhibition anti-miR-9 #1 and #3 (an 8-mer and a full-length anti-miR-9) was checked by co-transfection of a luciferase reporter containing 2X perfect match miR-9 binding sites.

**b)** U87MG were transfected with a miR-9 mimic, a miR-9 mimic labeled with biotin or a miR-9 mimic labeled with biotin and containing thiouridin. qPCR was used to measure *MALAT1* enrichment in the pull-out samples over the inputs. The p value was calculated by ANOVA

#### **Supplementary Fig.2a-c:**

**a)** qPCR shows down-regulation of miR-9 following AGO2 down-regulation in two different cell lines. Bars show mean  $\pm$  SEM (n=3).

**b)** qPCR shows that up-regulation of *MALAT1* following miR-9 inhibition in L428, can still be detected by using a full length (anti-miR-9 #3) or a 15-mer (anti-miR-9 #2) anti-miR-9. Bars show mean  $\pm$  SD.

**b)** qPCR shows down-regulation of *MALAT1* following miR-9 overexpression in two different cell lines. p-values were calculated by t-test. Bars show mean  $\pm$  SEM (n=3).

### **Supplementary Fig.3:**

Cells were transfected with two different constructs encoding luciferase activity under control of miR-9 binding sites (position 6229 and position 1199 respectively) in *MALATI* sequence, alone, in presence of a anti-miR-9 or a scrambled control oligonucleotide. anti-miR-9 induces an increase in luciferase activity. p-values were calculated by two-ways ANOVA. Bars show mean +/- SEM (n=3)

### **Supplementary Fig. 4a-b:**

**a)** Nuclear and cytoplasmic fractions were isolated from L428 transfected with a scramble control or an anti-miR-9, and immunoprecipitated using AGO2 antibody. The western blot shows the purity of the extracts and the efficiency of AGO2 immunoprecipitation. The signal for tubulin in the nuclei is the result of a cross-reaction of the antibody with the Immunoglobulin.

**b)** The amount of *MALATI* bound to AGO2 was measured by qPCR in nuclear and cytoplasmic fractions in presence of a scrambled control or an anti-miR-9. Bars show mean +/- SEM (n=3). p-values were calculated by two-ways ANOVA.

### **Supplementary figure 5:**

*MALATI* inhibition did not affect miR-9 expression. Levels of *MALATI* (relative to HPRT) and miR-9 (relative to RNU6B) were measured by qPCR in L428 upon inhibition of miR-9 only, *MALATI* only or a combination of the two. Error bars represent standard deviations.



| Symbol    | Locus                    | FPKM_KO | FPKM_WT  | [fold change KO/WT] | pvalue   | FDR      |
|-----------|--------------------------|---------|----------|---------------------|----------|----------|
| MTRNR2L9  | chr6:62284007-62284534   | 71.7536 | 0.599774 | -6.9025             | 2.65E-08 | 1.15E-05 |
| LOC91948  | chr15:98285845-98417659  | 9.01638 | 0.232217 | -5.2790             | 2.19E-06 | 4.61E-04 |
| -         | chr1:42965490-42966014   | 25.2106 | 1.11367  | -4.5006             | 7.63E-05 | 7.85E-03 |
| EIF4A3    | chr17:78109012-78121038  | 32.2404 | 1.4874   | -4.4380             | 0.000773 | 4.42E-02 |
| GSTA4     | chr6:52842745-52860751   | 151.195 | 7.21972  | -4.3883             | 0        | 0.00E+00 |
| -         | chr3:96336458-96337011   | 67.8731 | 3.48933  | -4.2818             | 1.44E-05 | 2.12E-03 |
| MALAT1    | chr11:65265232-65273939  | 20.332  | 1.23015  | -4.0469             | 0.000271 | 2.04E-02 |
| -         | chr5:14637426-14653547   | 5.94365 | 0.436944 | -3.7658             | 8.80E-06 | 1.44E-03 |
| RPS17     | chr15:82821160-82824865  | 27.2284 | 2.05439  | -3.7283             | 1.15E-05 | 1.79E-03 |
| MRPL2     | chr6:43021766-43027242   | 27.392  | 2.52882  | -3.4372             | 8.81E-05 | 8.76E-03 |
| MIR3648   | chr21:9825439-9827602    | 938.919 | 108.103  | -3.1186             | 1.18E-09 | 8.18E-07 |
| AGPAT3    | chr21:45285115-45407475  | 16.059  | 2.0597   | -2.9629             | 0.000412 | 2.78E-02 |
| RMRP      | chr9:35657747-35658015   | 83.8952 | 11.3264  | -2.8889             | 0.000152 | 1.31E-02 |
| CCDC117   | chr22:29168661-29185283  | 9.51769 | 1.86075  | -2.3547             | 0.000399 | 2.72E-02 |
| NEAT1     | chr11:65183915-65212973  | 3.53397 | 0.760942 | -2.2154             | 8.12E-05 | 8.24E-03 |
| NOMO3     | chr16:16326388-16388668  | 1.91484 | 0.421409 | -2.1839             | 0.000575 | 3.54E-02 |
| RPS17L    | chr15:83205503-83209208  | 38.6027 | 8.91287  | -2.1147             | 0.000291 | 2.14E-02 |
| BMS1      | chr10:43277953-43330385  | 11.3499 | 2.84696  | -1.9952             | 0.000212 | 1.70E-02 |
| RPL23A    | chr17:27046999-27053949  | 1472.66 | 416.216  | -1.8230             | 5.87E-05 | 6.40E-03 |
| CKS2      | chr9:91926112-91931618   | 81.494  | 26.2233  | -1.6359             | 0.000857 | 4.73E-02 |
| H3F3B     | chr17:73772514-73775860  | 65.243  | 159.663  | 1.2911              | 0.000799 | 4.53E-02 |
| BTF3      | chr5:72794243-72801448   | 184.665 | 469.695  | 1.3468              | 0.000919 | 4.99E-02 |
| PSMA6     | chr14:35761554-35786682  | 59.5217 | 156.212  | 1.3920              | 0.000809 | 4.57E-02 |
| RPL22     | chr1:6245079-6260600     | 71.2372 | 188.57   | 1.4044              | 0.000339 | 2.40E-02 |
| FABP5     | chr8:82192717-82197012   | 86.7022 | 230.273  | 1.4092              | 0.000421 | 2.83E-02 |
| RPS3      | chr11:75110561-75116733  | 316.626 | 852.598  | 1.4291              | 0.00036  | 2.51E-02 |
| CALM2     | chr2:47387220-47403740   | 137.881 | 373.881  | 1.4392              | 0.000172 | 1.45E-02 |
| RPS8      | chr1:45241245-45244412   | 662.411 | 1800.56  | 1.4426              | 0.000423 | 2.84E-02 |
| PSMB6     | chr17:4699456-4701790    | 43.8906 | 122.281  | 1.4782              | 0.000585 | 3.60E-02 |
| RPL18     | chr19:49118587-49122433  | 481.601 | 1355.85  | 1.4933              | 0.000259 | 1.98E-02 |
| RPL35     | chr9:127615754-127624240 | 543.074 | 1546.29  | 1.5096              | 0.000373 | 2.58E-02 |
| RPL17     | chr18:47007547-47018935  | 538.927 | 1544.42  | 1.5189              | 0.000538 | 3.37E-02 |
| CD81      | chr11:2398546-2418649    | 18.673  | 53.5429  | 1.5197              | 0.000705 | 4.12E-02 |
| LSM3      | chr3:14220227-14239869   | 58.0316 | 169.315  | 1.5448              | 0.0002   | 1.63E-02 |
| TSSC1     | chr2:3192740-3381653     | 7.31716 | 21.4274  | 1.5501              | 0.000777 | 4.43E-02 |
| RPS9      | chr19:54704707-54711515  | 163.522 | 481.268  | 1.5574              | 0.00054  | 3.38E-02 |
| RPL32     | chr3:12838170-12883081   | 938.831 | 2767.71  | 1.5598              | 0.000282 | 2.10E-02 |
| GSTP1     | chr11:67351065-67354124  | 27.654  | 82.5213  | 1.5773              | 0.000539 | 3.37E-02 |
| RPL7      | chr8:74202873-74205869   | 272.91  | 831.848  | 1.6079              | 3.58E-05 | 4.35E-03 |
| PSMD13    | chr11:236807-252984      | 17.5476 | 55.3819  | 1.6582              | 0.000136 | 1.21E-02 |
| GADD45GIP | chr19:13064971-13068050  | 15.7883 | 50.0452  | 1.6644              | 0.000818 | 4.60E-02 |
| PSMD14    | chr2:162164785-162268227 | 23.0729 | 74.1381  | 1.6840              | 0.000134 | 1.20E-02 |
| C17orf79  | chr17:30178883-30186326  | 10.8375 | 35.8992  | 1.7279              | 0.000397 | 2.71E-02 |
| RPS27L    | chr15:63437219-63450051  | 10.9062 | 36.4737  | 1.7417              | 0.000482 | 3.11E-02 |
| RPLP2     | chr11:809935-812876      | 384.629 | 1331.66  | 1.7917              | 2.91E-05 | 3.66E-03 |

|           |                          |          |         |         |          |          |
|-----------|--------------------------|----------|---------|---------|----------|----------|
| RPL23     | chr17:37004268-37010053  | 584.03   | 2049.45 | 1.8111  | 0.00014  | 1.24E-02 |
| ISG15     | chr1:948846-949919       | 10.6179  | 38.8108 | 1.8700  | 0.000335 | 2.39E-02 |
| RPL15     | chr3:23933571-23962332   | 134.495  | 500.714 | 1.8964  | 0.000615 | 3.73E-02 |
| VDAC1     | chr5:133307563-133340824 | 57.7159  | 217.341 | 1.9129  | 0.000464 | 3.03E-02 |
| TSPAN8    | chr12:71518871-71552560  | 9.54896  | 36.6865 | 1.9418  | 0.000809 | 4.57E-02 |
| SEC61G    | chr7:54819939-54826939   | 18.6801  | 72.4305 | 1.9551  | 0.000263 | 2.00E-02 |
| RGS16     | chr1:182567757-182573548 | 0.888233 | 3.4927  | 1.9753  | 0.000502 | 3.21E-02 |
| RPL41     | chr12:56510373-56511616  | 1863.37  | 7356.38 | 1.9811  | 9.40E-06 | 1.52E-03 |
| FAM162A   | chr3:122103022-122128961 | 8.92841  | 36.1602 | 2.0179  | 0.000121 | 1.13E-02 |
| PRDX5     | chr11:64085559-64089295  | 16.9015  | 70.1162 | 2.0526  | 0.000134 | 1.20E-02 |
| ISG20     | chr15:89182038-89198879  | 2.61343  | 12.3345 | 2.2387  | 0.000455 | 2.99E-02 |
| HLA-DRB1  | chr6:32485153-32557610   | 51.2171  | 262.416 | 2.3572  | 8.86E-08 | 3.17E-05 |
| BNIP3     | chr10:133780749-13379585 | 4.12045  | 23.3322 | 2.5015  | 0.00012  | 1.12E-02 |
| DDIT4     | chr10:74033676-74035797  | 2.00027  | 12.1298 | 2.6003  | 9.29E-07 | 2.25E-04 |
| S100A10   | chr1:151955385-151966714 | 29.078   | 186.627 | 2.6822  | 3.09E-06 | 6.15E-04 |
| CRIP1     | chr14:105952350-10595512 | 48.9306  | 326.008 | 2.7361  | 2.33E-05 | 3.05E-03 |
| BATF3     | chr1:212859758-212897575 | 28.4778  | 279.329 | 3.2941  | 0.000757 | 4.34E-02 |
| RPL13AP20 | chr12:13028385-13029261  | 0.746306 | 8.44167 | 3.4997  | 0.000822 | 4.62E-02 |
| GLUD2     | chrX:120181461-120183796 | 0.124602 | 1.77807 | 3.8349  | 4.40E-05 | 5.09E-03 |
| ANXA2P2   | chr9:33624222-33625532   | 0.435799 | 6.33699 | 3.8621  | 1.95E-06 | 4.20E-04 |
| IRF1      | chr5:131746464-131827446 | 2.5931   | 37.9666 | 3.8720  | 0.000865 | 4.77E-02 |
| LOC653566 | chr1:28421445-28423069   | 0.154899 | 2.47363 | 3.9972  | 5.85E-05 | 6.38E-03 |
| FAM45B    | chrX:129628914-129631421 | 0.155573 | 3.52287 | 4.5011  | 1.53E-07 | 5.06E-05 |
| -         | chr14:95267731-95267848  | 117.904  | 5592.31 | 5.5678  | 0.000134 | 1.20E-02 |
| -         | chr7:45291571-45291711   | 262.817  | 16680.2 | 5.9879  | 0        | 0.00E+00 |
| -         | chr7:57634331-57634470   | 24.1537  | 2191.63 | 6.5036  | 1.79E-05 | 2.48E-03 |
| -         | chr20:26145800-26145943  | 21.6398  | 2303.17 | 6.7338  | 9.74E-05 | 9.47E-03 |
| -         | chr4:33840812-33840965   | 36.9155  | 5558.16 | 7.2342  | 3.41E-09 | 2.00E-06 |
| -         | chr20:32788393-32788552  | 15.454   | 2854.63 | 7.5292  | 1.68E-08 | 7.90E-06 |
| -         | chr7:57634082-57634206   | 15.7394  | 3933.74 | 7.9654  | 9.20E-05 | 9.05E-03 |
| -         | chr4:33843590-33843715   | 14.0018  | 4915.52 | 8.4556  | 0.000704 | 4.11E-02 |
| -         | chr17:21544415-21544526  | 68.0117  | 29228.6 | 8.7474  | 5.79E-10 | 4.36E-07 |
| -         | chr7:57608150-57608312   | 2.75867  | 2310.98 | 9.7103  | 6.36E-09 | 3.39E-06 |
| -         | chr20:26141552-26141700  | 13.4318  | 13953.6 | 10.0208 | 0        | 0.00E+00 |
| HSP90AA1  | chr14:102547074-10260608 | 500.565  | 0       | Inf     | 0.00038  | 2.62E-02 |
| PDIA6     | chr2:10861774-10952960   | 107.662  | 0       | Inf     | 0.000188 | 1.56E-02 |
| KLF7      | chr2:207940082-208031639 | 1.024    | 0       | Inf     | 0.000911 | 4.96E-02 |
| EIF3D     | chr22:36906874-36925277  | 56.5165  | 0       | Inf     | 0.000575 | 3.55E-02 |
| RER1      | chr1:2323213-2345488     | 0        | 11.7973 | -Inf    | 2.17E-06 | 4.59E-04 |
| PHF13     | chr1:6673755-6684093     | 0        | 2.43253 | -Inf    | 1.07E-06 | 2.56E-04 |
| MFN2      | chr1:12040237-12073702   | 0        | 27.6929 | -Inf    | 6.26E-06 | 1.09E-03 |
| TMEM39B   | chr1:32537999-32568529   | 0        | 3.94927 | -Inf    | 0.000504 | 3.21E-02 |
| LMO4      | chr1:87794118-87814607   | 0        | 4.0075  | -Inf    | 8.25E-06 | 1.37E-03 |
| RNF11     | chr1:51701563-51739252   | 0        | 13.194  | -Inf    | 0.000639 | 3.83E-02 |
| RPL5      | chr1:93297593-93307481   | 0        | 2163.74 | -Inf    | 7.89E-08 | 2.88E-05 |
| LRR8B     | chr1:89989286-90185096   | 0        | 1.61027 | -Inf    | 0.000474 | 3.07E-02 |

|           |                          |   |         |      |          |          |
|-----------|--------------------------|---|---------|------|----------|----------|
| ATP5F1    | chr1:111982511-112004525 | 0 | 71.1217 | -Inf | 1.69E-08 | 7.90E-06 |
| TARS2     | chr1:150459808-150486265 | 0 | 6.07803 | -Inf | 1.09E-05 | 1.72E-03 |
| ATF3      | chr1:212738696-212794116 | 0 | 27.9198 | -Inf | 5.21E-11 | 5.42E-08 |
| SETDB1    | chr1:150898814-150937220 | 0 | 2.03008 | -Inf | 0.00042  | 2.83E-02 |
| DEPDC1    | chr1:68939834-68962799   | 0 | 11.3227 | -Inf | 2.03E-10 | 1.76E-07 |
| CASP9     | chr1:15818759-15851377   | 0 | 2.37474 | -Inf | 0.000337 | 2.40E-02 |
| POGZ      | chr1:151375011-151431941 | 0 | 2.45075 | -Inf | 5.00E-05 | 5.64E-03 |
| NRD1      | chr1:52082545-52344609   | 0 | 13.9573 | -Inf | 0.000471 | 3.06E-02 |
| MRPL9     | chr1:151732122-151743806 | 0 | 28.5022 | -Inf | 6.73E-05 | 7.09E-03 |
| DCAF8     | chr1:160175124-160234231 | 0 | 12.7709 | -Inf | 1.42E-06 | 3.21E-04 |
| NCOA4     | chr10:51565107-51591439  | 0 | 22.2817 | -Inf | 1.63E-11 | 2.07E-08 |
| EIF4EBP2  | chr10:72163860-72188374  | 0 | 3.40582 | -Inf | 5.99E-06 | 1.05E-03 |
| PDCD4     | chr10:112631552-11267912 | 0 | 4.39896 | -Inf | 1.47E-05 | 2.15E-03 |
| DLG5      | chr10:79550546-79689583  | 0 | 2.5075  | -Inf | 2.32E-13 | 5.14E-10 |
| SMNDC1    | chr10:112052797-11206500 | 0 | 7.31461 | -Inf | 2.92E-05 | 3.68E-03 |
| -         | chr10:98510319-98510670  | 0 | 69.58   | -Inf | 2.15E-10 | 1.84E-07 |
| NOLC1     | chr10:103892786-10392362 | 0 | 21.2027 | -Inf | 0.000142 | 1.25E-02 |
| MRPL23    | chr11:1968501-1977839    | 0 | 30.0062 | -Inf | 1.39E-06 | 3.15E-04 |
| C10orf137 | chr10:127408083-12745271 | 0 | 1.92688 | -Inf | 0.000343 | 2.43E-02 |
| CCDC88B   | chr11:64104494-64125006  | 0 | 3.61562 | -Inf | 7.55E-08 | 2.78E-05 |
| POLL      | chr10:103338518-10334802 | 0 | 2.61614 | -Inf | 0.000131 | 1.19E-02 |
| NDUFS8    | chr11:67798083-67804114  | 0 | 35.3347 | -Inf | 2.27E-06 | 4.74E-04 |
| CTTN      | chr11:70244026-70282690  | 0 | 16.0494 | -Inf | 6.03E-07 | 1.61E-04 |
| C11orf1   | chr11:111744779-11175479 | 0 | 12.5173 | -Inf | 1.41E-05 | 2.09E-03 |
| PAK1      | chr11:77032591-77185108  | 0 | 4.07502 | -Inf | 3.70E-05 | 4.47E-03 |
| MARK2     | chr11:63606396-63678492  | 0 | 1.60391 | -Inf | 0.000355 | 2.49E-02 |
| DDX6      | chr11:118618469-11866197 | 0 | 5.47037 | -Inf | 2.46E-09 | 1.51E-06 |
| DERA      | chr12:16064185-16190315  | 0 | 28.1275 | -Inf | 3.89E-14 | 1.10E-10 |
| SFSWAP    | chr12:132195616-13228428 | 0 | 6.05825 | -Inf | 9.13E-06 | 1.48E-03 |
| DNAJC14   | chr12:56211805-56236735  | 0 | 13.1304 | -Inf | 1.78E-07 | 5.74E-05 |
| NACA      | chr12:57106204-57146175  | 0 | 364.436 | -Inf | 2.69E-07 | 8.14E-05 |
| NAA16     | chr13:41885340-41951166  | 0 | 1.4618  | -Inf | 1.97E-05 | 2.68E-03 |
| BUD13     | chr11:116618885-11664381 | 0 | 2.64185 | -Inf | 0.000359 | 2.50E-02 |
| LIG4      | chr13:108859791-10887071 | 0 | 1.70593 | -Inf | 5.60E-05 | 6.18E-03 |
| C11orf61  | chr11:124636393-12467946 | 0 | 2.56952 | -Inf | 0.000915 | 4.98E-02 |
| SOCS4     | chr14:55493843-55516206  | 0 | 2.83591 | -Inf | 1.35E-05 | 2.02E-03 |
| LRMP      | chr12:25189575-25348094  | 0 | 8.05643 | -Inf | 0.000503 | 3.21E-02 |
| TARBP2    | chr12:53893594-53900215  | 0 | 4.93973 | -Inf | 0.00043  | 2.87E-02 |
| MTHFD1    | chr14:64854758-64926725  | 0 | 24.1528 | -Inf | 2.90E-06 | 5.81E-04 |
| CNOT2     | chr12:70636773-70748773  | 0 | 7.4114  | -Inf | 0.000314 | 2.27E-02 |
| KNTC1     | chr12:122987943-12311099 | 0 | 6.45815 | -Inf | 0.000481 | 3.10E-02 |
| ACIN1     | chr14:23527771-23569665  | 0 | 20.6801 | -Inf | 7.05E-05 | 7.34E-03 |
| ABCD2     | chr12:39940914-40013975  | 0 | 2.28595 | -Inf | 0.000842 | 4.68E-02 |
| CFL2      | chr14:35179587-35184330  | 0 | 5.23177 | -Inf | 1.90E-11 | 2.31E-08 |
| HSP90AA1  | chr14:102547074-10260608 | 0 | 727.066 | -Inf | 1.18E-09 | 8.18E-07 |
| RAGE      | chr14:102691361-10277153 | 0 | 4.26016 | -Inf | 8.31E-05 | 8.37E-03 |

|          |                          |   |         |      |          |          |
|----------|--------------------------|---|---------|------|----------|----------|
| ITM2B    | chr13:48807273-48836232  | 0 | 5.84056 | -Inf | 0.000829 | 4.64E-02 |
| CDCA4    | chr14:105475909-10548742 | 0 | 13.9895 | -Inf | 3.40E-09 | 2.00E-06 |
| BAHD1    | chr15:40733102-40760441  | 0 | 2.41344 | -Inf | 3.56E-06 | 6.92E-04 |
| PIAS1    | chr15:68346571-68498448  | 0 | 4.99079 | -Inf | 5.25E-06 | 9.52E-04 |
| FAH      | chr15:80445135-80478924  | 0 | 8.87236 | -Inf | 5.56E-06 | 9.94E-04 |
| RAB27A   | chr15:55495163-55582088  | 0 | 4.0446  | -Inf | 5.95E-06 | 1.05E-03 |
| AAGAB    | chr15:67493366-67547074  | 0 | 11.5917 | -Inf | 2.28E-11 | 2.72E-08 |
| FLYWCH2  | chr16:2933195-2949383    | 0 | 10.099  | -Inf | 1.47E-05 | 2.14E-03 |
| BFAR     | chr16:14726667-14763093  | 0 | 13.1617 | -Inf | 9.82E-12 | 1.36E-08 |
| BCKDK    | chr16:31119661-31124112  | 0 | 7.23094 | -Inf | 1.44E-05 | 2.12E-03 |
| PHKB     | chr16:47188904-47735434  | 0 | 2.97904 | -Inf | 2.45E-05 | 3.18E-03 |
| MT2A     | chr16:56642477-56643409  | 0 | 95.8869 | -Inf | 8.64E-07 | 2.13E-04 |
| TRAPPC2L | chr16:88880141-88929204  | 0 | 5.80755 | -Inf | 2.09E-06 | 4.46E-04 |
| AKAP13   | chr15:85923811-86292586  | 0 | 2.47305 | -Inf | 0.000191 | 1.58E-02 |
| GOLGA8A  | chr15:34671267-34875771  | 0 | 2.19794 | -Inf | 0.000475 | 3.08E-02 |
| RAD51C   | chr17:56769962-56811692  | 0 | 10.9474 | -Inf | 3.02E-05 | 3.77E-03 |
| MRPL12   | chr17:79670399-79674556  | 0 | 22.7748 | -Inf | 1.68E-06 | 3.68E-04 |
| PFN1     | chr17:4848946-4852383    | 0 | 2016.98 | -Inf | 2.11E-08 | 9.51E-06 |
| VAMP2    | chr17:8061893-8066323    | 0 | 4.2356  | -Inf | 4.49E-06 | 8.39E-04 |
| DDX5     | chr17:62473901-62534062  | 0 | 56.254  | -Inf | 8.57E-09 | 4.34E-06 |
| SNX29    | chr16:12070584-12668146  | 0 | 2.85352 | -Inf | 0.000541 | 3.38E-02 |
| CBX4     | chr17:77806953-77813213  | 0 | 3.46777 | -Inf | 5.63E-05 | 6.20E-03 |
| PYCR1    | chr17:79890266-79895195  | 0 | 18.501  | -Inf | 3.78E-10 | 2.98E-07 |
| ATP5A1   | chr18:43664109-43684199  | 0 | 119.346 | -Inf | 6.05E-12 | 9.00E-09 |
| GPI      | chr19:34850753-34893318  | 0 | 93.2597 | -Inf | 3.74E-11 | 4.04E-08 |
| XRCC1    | chr19:44047463-44086256  | 0 | 7.08449 | -Inf | 3.90E-05 | 4.65E-03 |
| ZNF598   | chr16:2047651-2059763    | 0 | 4.77443 | -Inf | 0.000188 | 1.56E-02 |
| ZNF434   | chr16:3432082-3451075    | 0 | 2.16353 | -Inf | 0.000115 | 1.08E-02 |
| RRN3     | chr16:15012052-15475278  | 0 | 8.2762  | -Inf | 0.000275 | 2.06E-02 |
| CHMP2A   | chr19:59062932-59066486  | 0 | 24.7512 | -Inf | 8.99E-06 | 1.47E-03 |
| ZNF638   | chr2:71503689-71662189   | 0 | 7.72398 | -Inf | 6.28E-10 | 4.67E-07 |
| RPE      | chr2:210867304-211036051 | 0 | 6.67795 | -Inf | 3.66E-05 | 4.43E-03 |
| TRPV1    | chr17:3468739-3539616    | 0 | 1.64728 | -Inf | 0.000652 | 3.89E-02 |
| WDSUB1   | chr2:160092303-160143236 | 0 | 7.06243 | -Inf | 6.40E-11 | 6.37E-08 |
| C20orf4  | chr20:34824368-34844853  | 0 | 8.62204 | -Inf | 9.36E-14 | 2.23E-10 |
| BLCAP    | chr20:36145818-36156333  | 0 | 6.2178  | -Inf | 4.00E-06 | 7.63E-04 |
| CHD6     | chr20:40030749-40247216  | 0 | 1.64967 | -Inf | 7.65E-06 | 1.29E-03 |
| ATP5O    | chr21:35275756-35288158  | 0 | 102.589 | -Inf | 2.70E-11 | 3.05E-08 |
| C17orf62 | chr17:80347085-80408707  | 0 | 11.1274 | -Inf | 0.000457 | 3.00E-02 |
| MRPL40   | chr22:19419618-19423596  | 0 | 27.5322 | -Inf | 8.44E-07 | 2.10E-04 |
| EIF3D    | chr22:36906874-36925277  | 0 | 97.4004 | -Inf | 6.58E-17 | 2.93E-13 |
| KIF15    | chr3:44803182-44915459   | 0 | 3.70414 | -Inf | 1.39E-05 | 2.07E-03 |
| FCGRT    | chr19:50010110-50029723  | 0 | 3.04165 | -Inf | 0.000213 | 1.71E-02 |
| KLF16    | chr19:1852397-1876160    | 0 | 2.01837 | -Inf | 0.000773 | 4.42E-02 |
| EPHB1    | chr3:134514098-134979307 | 0 | 16.1644 | -Inf | 1.24E-07 | 4.23E-05 |
| NOSIP    | chr19:50058231-50083844  | 0 | 6.34014 | -Inf | 0.000151 | 1.30E-02 |

|         |                          |   |         |      |          |          |
|---------|--------------------------|---|---------|------|----------|----------|
| SELT    | chr3:150320788-150348234 | 0 | 28.0473 | -Inf | 5.46E-09 | 2.95E-06 |
| -       | chr2:7913872-7928740     | 0 | 2.26791 | -Inf | 0.00047  | 3.06E-02 |
| GPN1    | chr2:27848505-27917847   | 0 | 16.1367 | -Inf | 0.000576 | 3.55E-02 |
| TBC1D5  | chr3:17198608-17784240   | 0 | 3.37185 | -Inf | 5.70E-07 | 1.54E-04 |
| IFT57   | chr3:107879658-107943673 | 0 | 6.06757 | -Inf | 5.35E-06 | 9.66E-04 |
| SLC41A3 | chr3:125725170-125820391 | 0 | 4.1081  | -Inf | 8.00E-06 | 1.34E-03 |
| PIK3CB  | chr3:138372036-138553781 | 0 | 2.16904 | -Inf | 4.30E-05 | 5.00E-03 |
| TNK2    | chr3:195590095-195636094 | 0 | 2.2565  | -Inf | 8.68E-05 | 8.66E-03 |
| WHSC1   | chr4:1873122-2010962     | 0 | 5.79231 | -Inf | 5.51E-05 | 6.10E-03 |
| DCK     | chr4:71859264-71896629   | 0 | 6.91794 | -Inf | 2.31E-05 | 3.04E-03 |
| SCOC    | chr4:141178439-141303710 | 0 | 5.75409 | -Inf | 6.54E-08 | 2.50E-05 |
| UBE2D3  | chr4:103717132-103790032 | 0 | 36.7881 | -Inf | 1.72E-07 | 5.64E-05 |
| POLR3G  | chr5:89754019-89810370   | 0 | 7.56898 | -Inf | 4.76E-07 | 1.32E-04 |
| MX1     | chr21:42792519-42831141  | 0 | 3.44889 | -Inf | 0.000108 | 1.03E-02 |
| GCFC1   | chr21:34100424-34144249  | 0 | 4.94089 | -Inf | 0.000302 | 2.21E-02 |
| C5orf27 | chr5:95187727-95195849   | 0 | 3.98666 | -Inf | 6.88E-06 | 1.18E-03 |
| DMXL1   | chr5:118406714-118584822 | 0 | 4.78624 | -Inf | 5.00E-05 | 5.64E-03 |
| TOM1    | chr22:35695267-35743987  | 0 | 2.88768 | -Inf | 0.000383 | 2.64E-02 |
| LMNB1   | chr5:126112314-126172712 | 0 | 32.1904 | -Inf | 1.68E-09 | 1.10E-06 |
| REEP2   | chr5:137774773-137782852 | 0 | 1.75049 | -Inf | 4.03E-05 | 4.79E-03 |
| PARP14  | chr3:122399383-122449765 | 0 | 2.65912 | -Inf | 0.000147 | 1.28E-02 |
| HARS2   | chr5:140071017-140078890 | 0 | 4.62844 | -Inf | 7.06E-06 | 1.20E-03 |
| ARMC8   | chr3:137906126-138048728 | 0 | 5.55877 | -Inf | 0.000708 | 4.13E-02 |
| SKP1    | chr5:133491731-133512724 | 0 | 66.4989 | -Inf | 3.91E-13 | 7.98E-10 |
| ATOX1   | chr5:151122382-151138210 | 0 | 49.3501 | -Inf | 3.01E-07 | 8.95E-05 |
| ERC2    | chr3:55542335-56502526   | 0 | 1.6281  | -Inf | 0.000607 | 3.70E-02 |
| SLU7    | chr5:159828647-159846168 | 0 | 9.38768 | -Inf | 7.53E-10 | 5.45E-07 |
| DUSP1   | chr5:172189940-172205684 | 0 | 4.10551 | -Inf | 7.45E-05 | 7.70E-03 |
| FBXO9   | chr6:52929740-52965670   | 0 | 4.49831 | -Inf | 1.59E-06 | 3.51E-04 |
| CD109   | chr6:74405507-74538041   | 0 | 1.5744  | -Inf | 7.24E-05 | 7.51E-03 |
| TNIK    | chr3:170779028-171178262 | 0 | 1.66377 | -Inf | 0.000635 | 3.82E-02 |
| NRN1    | chr6:5998059-6008208     | 0 | 5.10868 | -Inf | 8.14E-07 | 2.06E-04 |
| DLG1    | chr3:196769430-197030621 | 0 | 3.49459 | -Inf | 0.00047  | 3.06E-02 |
| COX7A2  | chr6:75947390-75953644   | 0 | 142.382 | -Inf | 2.08E-14 | 6.54E-11 |
| EXOC1   | chr4:56719815-56771244   | 0 | 2.86141 | -Inf | 0.000232 | 1.82E-02 |
| EXOC1   | chr4:56719815-56771244   | 0 | 2.72366 | -Inf | 0.000436 | 2.90E-02 |
| LYRM2   | chr6:90142896-90348474   | 0 | 4.53024 | -Inf | 3.95E-05 | 4.70E-03 |
| LARP1B  | chr4:128981412-129132935 | 0 | 3.81394 | -Inf | 0.000257 | 1.97E-02 |
| BZW2    | chr7:16685646-16824161   | 0 | 36.8867 | -Inf | 2.58E-11 | 2.97E-08 |
| GRSF1   | chr4:71681498-71709089   | 0 | 3.29974 | -Inf | 0.000106 | 1.01E-02 |
| MDH2    | chr7:75677392-75695930   | 0 | 49.4065 | -Inf | 5.78E-05 | 6.33E-03 |
| ZKSCAN1 | chr7:99613216-99639741   | 0 | 2.11349 | -Inf | 4.24E-05 | 4.97E-03 |
| PIK3CG  | chr7:106505611-106549427 | 0 | 10.2501 | -Inf | 1.42E-05 | 2.09E-03 |
| TNRC18  | chr7:5346420-5463177     | 0 | 2.67833 | -Inf | 2.18E-07 | 6.81E-05 |
| C7orf70 | chr7:6369039-6388590     | 0 | 4.7983  | -Inf | 1.90E-05 | 2.61E-03 |
| SBDS    | chr7:66452689-66460588   | 0 | 12.0417 | -Inf | 3.63E-05 | 4.40E-03 |

|         |                          |   |         |      |          |          |
|---------|--------------------------|---|---------|------|----------|----------|
| YWHAG   | chr7:75956084-75988342   | 0 | 25.5515 | -Inf | 6.89E-09 | 3.62E-06 |
| COPG2   | chr7:130126045-130371406 | 0 | 7.04319 | -Inf | 4.86E-05 | 5.51E-03 |
| FDFT1   | chr8:11660189-11725646   | 0 | 32.203  | -Inf | 3.98E-05 | 4.73E-03 |
| DECR1   | chr8:91013579-91064227   | 0 | 14.6529 | -Inf | 3.75E-07 | 1.08E-04 |
| MFHAS1  | chr8:8640860-8751179     | 0 | 12.8497 | -Inf | 2.15E-09 | 1.35E-06 |
| GGH     | chr8:63927638-63951683   | 0 | 24.9475 | -Inf | 4.16E-09 | 2.36E-06 |
| EYA1    | chr8:72109600-72274488   | 0 | 1.5611  | -Inf | 5.36E-05 | 5.97E-03 |
| NQO2    | chr6:3000064-3025547     | 0 | 17.7734 | -Inf | 0.000165 | 1.41E-02 |
| PGBD1   | chr6:28249277-28271079   | 0 | 1.53192 | -Inf | 0.000694 | 4.07E-02 |
| ABCF1   | chr6:30539169-30559309   | 0 | 7.21045 | -Inf | 0.000386 | 2.65E-02 |
| COX6C   | chr8:100890222-100906242 | 0 | 53.7245 | -Inf | 1.00E-08 | 4.99E-06 |
| RNF20   | chr9:104296132-104500862 | 0 | 4.11365 | -Inf | 3.78E-06 | 7.32E-04 |
| PHF3    | chr6:64344491-64424463   | 0 | 3.64649 | -Inf | 0.00017  | 1.44E-02 |
| CA5BP1  | chrX:15692888-15721814   | 0 | 2.06357 | -Inf | 6.02E-05 | 6.53E-03 |
| GNL3L   | chrX:54556643-54593720   | 0 | 2.63714 | -Inf | 3.88E-09 | 2.26E-06 |
| PGK1    | chrX:77320672-77382324   | 0 | 212.766 | -Inf | 1.79E-10 | 1.57E-07 |
| HPRT1   | chrX:133507141-133648069 | 0 | 30.9591 | -Inf | 5.94E-05 | 6.45E-03 |
| ATP6AP1 | chrX:153656977-153664862 | 0 | 14.1113 | -Inf | 8.58E-07 | 2.12E-04 |
| SNX14   | chr6:86214961-86353107   | 0 | 20.7651 | -Inf | 0.000356 | 2.49E-02 |
| POP7    | chr7:100303675-100305123 | 0 | 10.7324 | -Inf | 0.000737 | 4.25E-02 |
| PDLIM2  | chr8:22436253-22455538   | 0 | 5.2254  | -Inf | 0.00014  | 1.24E-02 |
| INTS9   | chr8:28625174-28747698   | 0 | 3.37628 | -Inf | 0.000212 | 1.70E-02 |
| KLF10   | chr8:103661004-103667983 | 0 | 3.23787 | -Inf | 0.000738 | 4.26E-02 |
| NDOR1   | chr9:140098534-140113815 | 0 | 2.3363  | -Inf | 0.000197 | 1.61E-02 |
| TCEAL3  | chrX:102862833-102866289 | 0 | 1.88523 | -Inf | 0.000405 | 2.75E-02 |
| SMC1A   | chrX:53401069-53461450   | 0 | 7.10981 | -Inf | 0.000626 | 3.78E-02 |

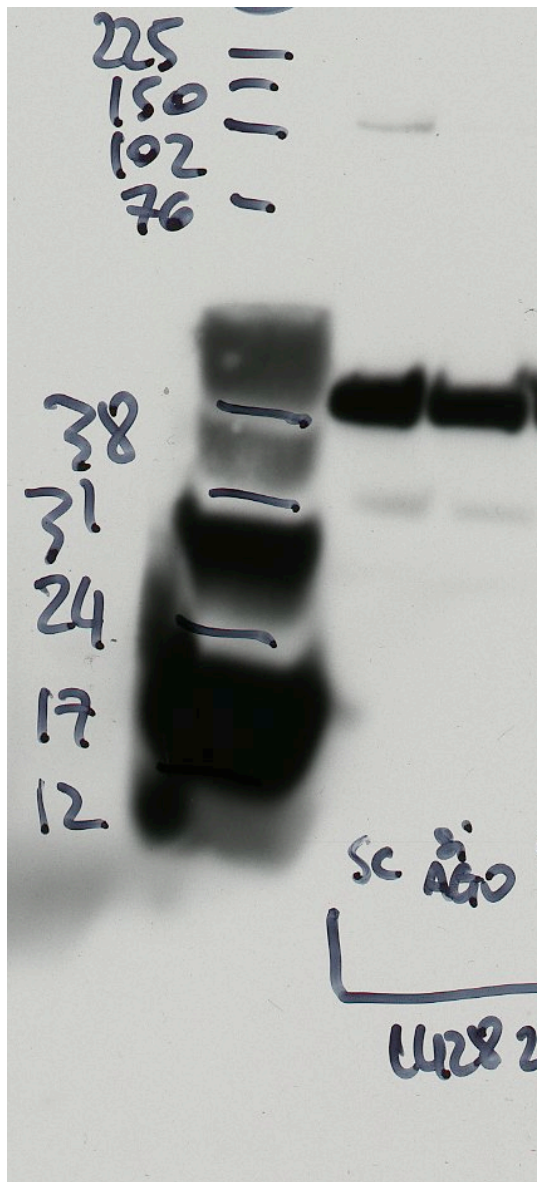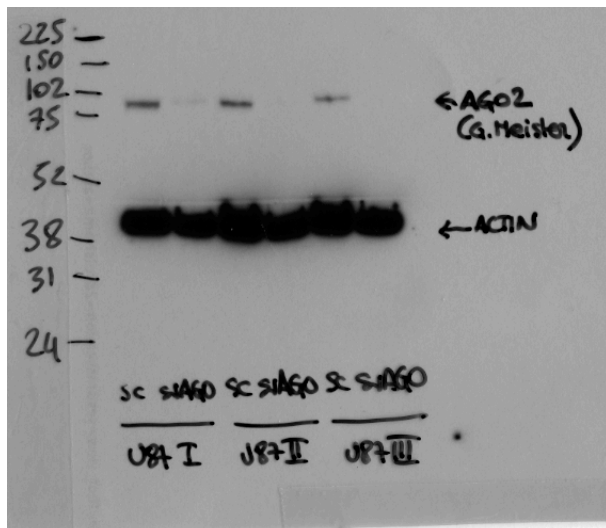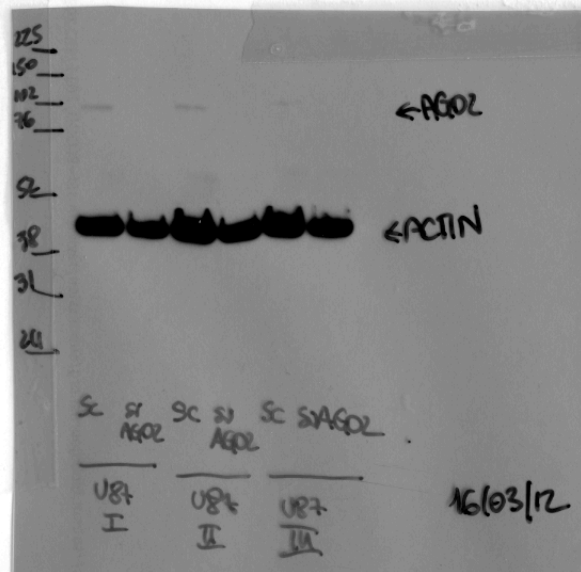

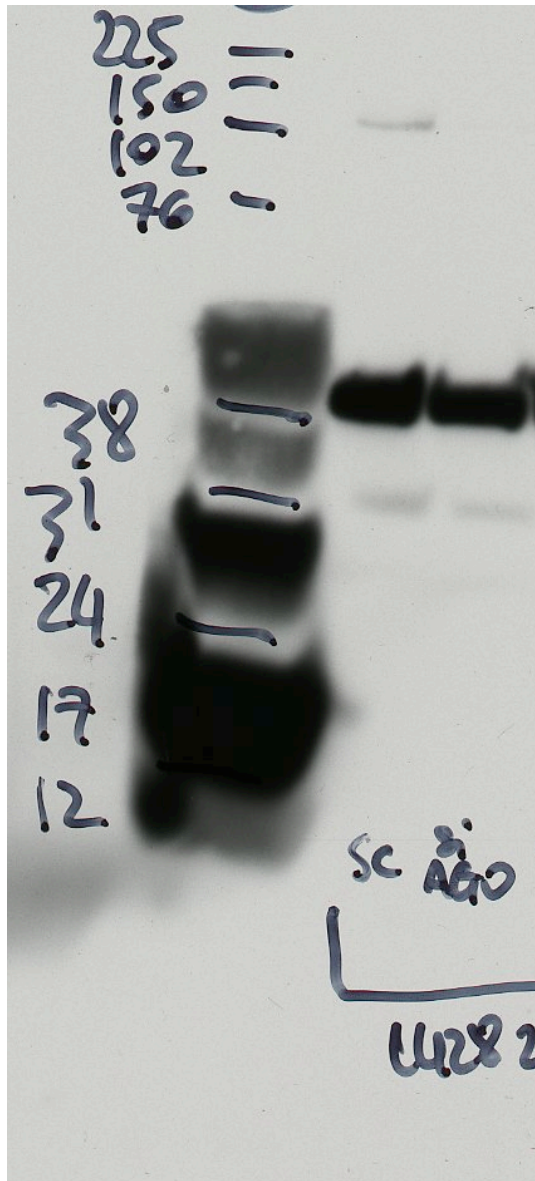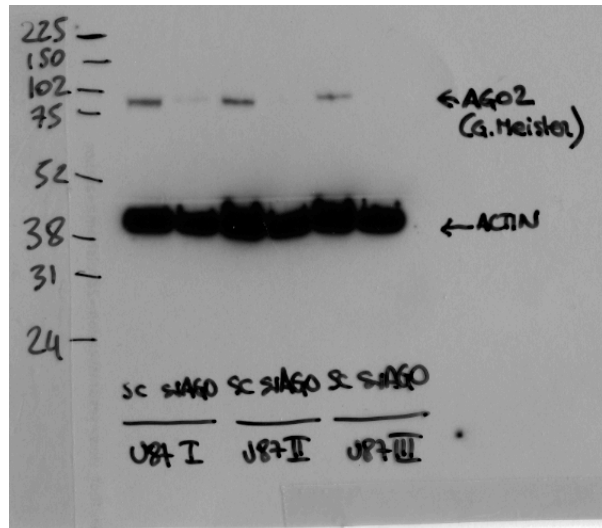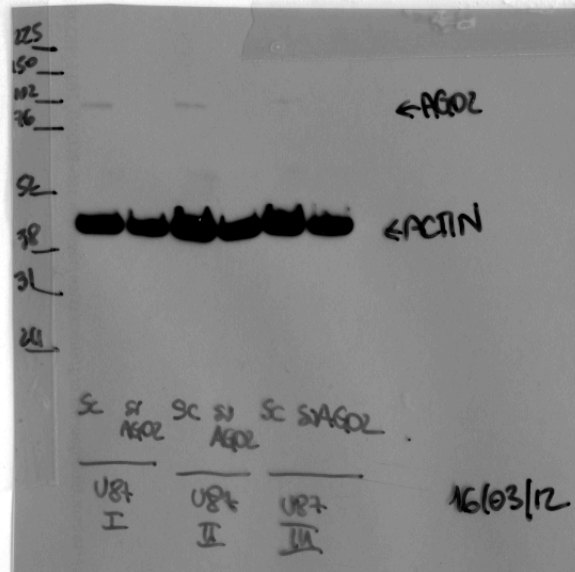

Figure 2a full gel



Figure 4c full gel

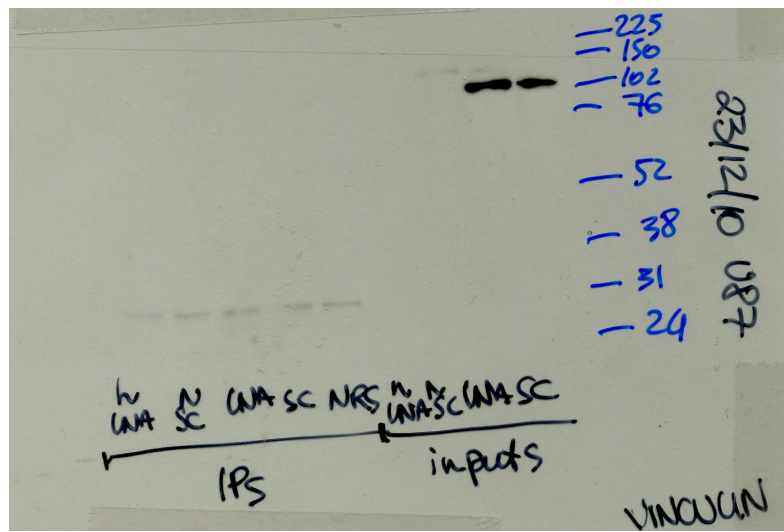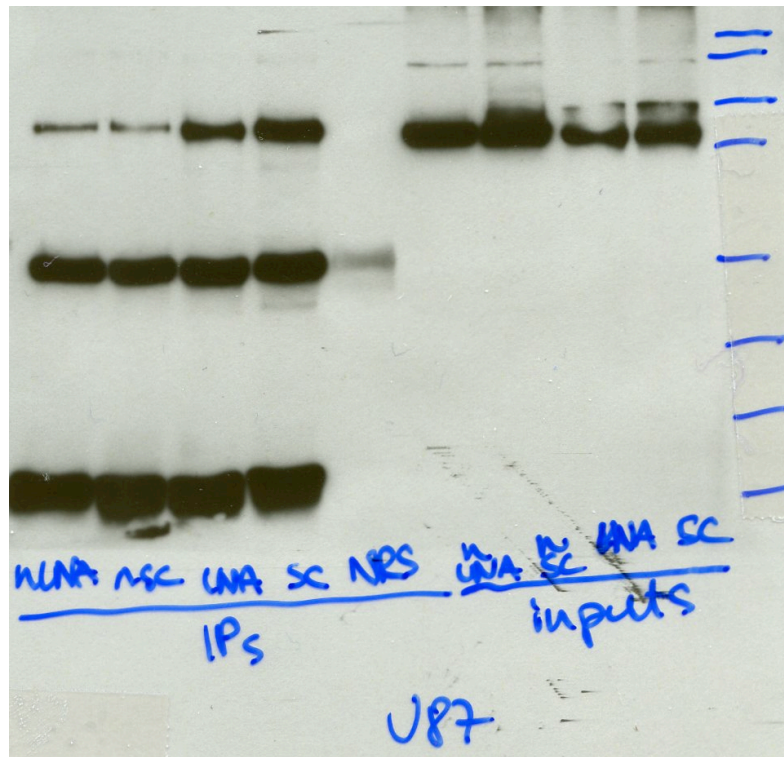

Supplement: srep02535-s1.pdf [file srep02535-s1.pdf]
